# WITHDRAWN ARTICLE

## WITHDRAWN: Regulation of miR-375 and Sonic hedgehog on vascular endothelial growth factor in preeclampsia rats and its effect on trophoblast cells

Yanfang Ren; Yifang Xu; Yuanyuan Wang; Yongjie Jiang; Jianguo Wen

*Bioscience Reports* (2020) BSR20200613; DOI: 10.1042/BSR20200613

The Accepted Manuscript version of this article (published on 15 May 2020) was withdrawn on 21 September 2020 at the request of the authors as they stated that the study is incomplete. In addition, upon acceptance, the Editorial Office were contacted by the authors to change the authorship of the accepted paper; this was questioned by the Editorial Office and was followed by the author request to withdraw the paper.
